# Supplementary material
Source: publisher figshare collection journal article supplement (https://frontiersin.figshare.com/ndownloader/files/25742903)
Supplement: Supplementary file 1 [file 25742903]

## ANNEXE 4 : Matlab code *Grey Scale Image Analyses* (Bjork et al, 2009)

```
% ===== %
% GRAY SCALE IMAGE ANALYSIS
%
% PHASE RECOGNITION AND PARTICLE IDENTIFICATION
%
% Torbjørn Bjørk, November 2005
% Updated June 2006
% ===== %

clear;
close all;
clc;

warning off;

% ===== %
% USER INPUT
% ===== %

% OUTPUT FILE NAME
output = 'output';

% READ IMAGE GRAPHICS FROM FILE
image = imread('K04-C21_g.jpg');
image = image(:,1:floor(size(image,2)/2));

% MAGNIFICATION TO DISPLAY IMAGE GRAPHICS
mag = 50;      % of original size

% CONVERSION TO GRAYSCALE
convert2grayscale = false;

% INCREASE CONTRAST

% 1. Saturate low and high intensity values
adjust = false;

% 2. Stretch and adjust intensity values to full length of gray scale
stretch_scale = false;

% STRUCTURING ELEMENT
% Set shape and size of structuring element for morphological opening and closing.
se = strel('square',2); % See reference page in Help browser for other shapes

% SET CONNECTIVITY OF PARTICLES (3x3 ENVIRONMENT)
connectivity = 4;      % 4: Only nearest neighbours.
                        % 8: Nearest and next-nearest neighbours.

% MANUAL REMOVAL OF PARTICLES
% Manual removal of particles using a graphical interface
manually = false;

% MINIMUM DETECTABLE PARTICLE AREA
% Set minimum particle area (pixels)
min_area = 200; % 200

% POST-PROCESSING
% Plotting of particles
boundaries = false;    % true: super-impose particle boundaries
                        % (Note: Touching particles will be plotted
                        % with same colour regardless of particle labeling).
                        % false: Super-impose transparent particles.

% METHOD SELECTION
METHOD = {'Thresholding', 'Watershed'};
method_choice = 1;

% METHOD INPUT
switch METHOD{method_choice}
```

```

case 'Thresholding'

    % Exaggerate particle boundadries
    exaggerate = false;
    ex_number = 1; % Number of times to add tophat and subtract bothat from original image

    % Gray scale range (0 - 255) for thresholding
    lower_boundary = 150;
    upper_boundary = 200;

    % If particle particle density is high and more processing is
    % needed to identify particles
    heavy = false; % MUST BE FALSE; A LITTLE BUG.

    % Number of times to perform morphological closing (dilate + erode)
    % to make the particle boundaries more smooth
    close_factor = 2;

    % Number of times to perform morphological opening (erode + dilate)
    % to separate and identify particles (used if heavy = true)
    open_factor = 1;

case 'Watershed'

    %Inverse image (particles need to be dark to function as catchment basins)
    inverse = true;

    % Exaggerate particle boundadries
    exaggerate = true;
    ex_number = 1; % Number of times to add tophat and subtract bothat from original image

    % Detect intennsity valleys lower than specified threshold
    threshold = true;
    basin_min = 20;

    % Oversegmentation
    oversegmentation = false;
    overseg_removal = 90; % Remove any catchment basin shallower than overseg_removal
end

% ===== %

% MAKE OUTPUT DIRECTORY
[SUCCESS,MESSAGE,MESSAGEID] = mkdir('OUTPUT');

%ADD PATH TO ADDITIONAL FUNCTIONS
addpath([pwd, dir_div, 'FUNCTIONS']);

disp('% ===== %')
disp('% GRAY SCALE IMAGE ANALYSIS          %')
disp('%                               %')
disp('% PHASE SEPARATION AND PARTICLE IDENTIFICATION %')
disp('% ===== %')
disp(' ')

if convert2grayscale | stretch_scale | adjust
    disp('% ===== %')
    disp('PRE-PROCESSING')
    disp('% ===== %')
    disp(' ')
end

% ===== %
% DISPLAY IMAGE
% ===== %

% Convert to grayscale using the NTSC standard for luminance
if convert2grayscale
    disp('Converting to gray scale')
    image = .2989*image(:,:,1)...
    +.5870*image(:,:,2)...
    +.1140*image(:,:,3);

```

```

end

% Stretch and adjust intensity values to full lenght of gray scale
if stretch_scale
    disp('Stretching and adjusting intensity values to full lenght of gray scale')
    image = histeq(image);
end

% Saturate at low and high intensity values
if adjust
    disp('Saturating low and high intensity values')
    image = imadjust(image);
end

% ORIGINAL TOTAL SIZE OF IMAGE
original_total_area = size(image,1)*size(image,2);

% MAKE IMAGE DUPLICATE FOR PROCESSING

label = image;

% Display image
figure(1)
clf
imshow(image,'InitialMagnification',mag)
title('Original Image')

% ===== %
% METHOD SWITCH
% ===== %

disp(' ')
disp('% ===== %')
disp('PROCESSING')
disp('% ===== %')
disp(' ')

switch METHOD{method_choice}

case 'Thresholding'
    fprintf(1, ' Method: Thresholding,  ');

    if heavy == false
        fprintf(1,'Option: Light processing')
        disp(' ')
        [label,num,area_particles,total_area,label_edges,area_edge_grains,area_matrix]=...
        threshold_light(label,image,mag,lower_boundary,upper_boundary,min_area,...
        original_total_area,close_factor,se,manually,boundaries,connectivity,exaggerate,ex_number)
    else
        fprintf(1,'Option: Heavy processing')
        disp(' ')
        [label,num,area_particles,total_area,label_edges,area_edge_grains,area_matrix] = ...
        threshold_heavy(label,image,mag,lower_boundary,upper_boundary,min_area,...
        original_total_area,close_factor,open_factor,se,manually,boundaries,connectivity,exaggerate,ex_number);
    end

case 'Watershed'
    disp('Method: Watershed')
    disp(' ')
    [label,num,area_particles,total_area,label_edges,area_edge_grains,area_matrix] = ...
    watershedding(label,image,mag,min_area,original_total_area,se,oversegmentation,...
    overseg_removal,basin_min,exaggerate,ex_number,threshold,inverse,manually,boundaries,connectivity);
end

% ===== %
% SAVE DATA
% ===== %
disp('% ===== %')
disp('POST-PROCESSING')
disp('% ===== %')
disp(' ')

```

```

save(['OUTPUT',dir_div,output], 'label','num','area_particles','total_area','label_edges','area_edge_grains','area_matrix','original_total_area');
disp(['Data saved as ',pwd,dir_div,'OUTPUT',dir_div,output,'.mat'])
disp(' ')
disp([output,'.mat contains the following matrices:'])
disp(' ')
disp('label:          Labeled matrix of particles*')
disp('num:           Number of particle')
disp('area_particles:  Area of particles')
disp('area_matrix:     Area of matrix')
disp('total_area:      The total area (area of particles + area of matrix)')
disp('label_edges:     Labeled matrix of removed edge particles')
disp('area_edge_grains:  Area of edge particles')
disp('original_total_area: Area of original image (total area + area of edge particles)')
disp(' ')
disp('*The "regionprops"-function can be used for calculation')
disp('of size and shape properties of the particles')
disp(' ')
disp('% ===== %')

close(warndlg)

close(warndlg('FLOOD & FILL - REMOVE PARTICLES MANUALLY'))

```
